# Supplementary material
Source: PubMed Central journal article supplement (PMC3991695)
Supplement: NIHMS397688-supplement-supplement_1.pdf [file NIHMS397688-supplement-supplement_1.pdf]

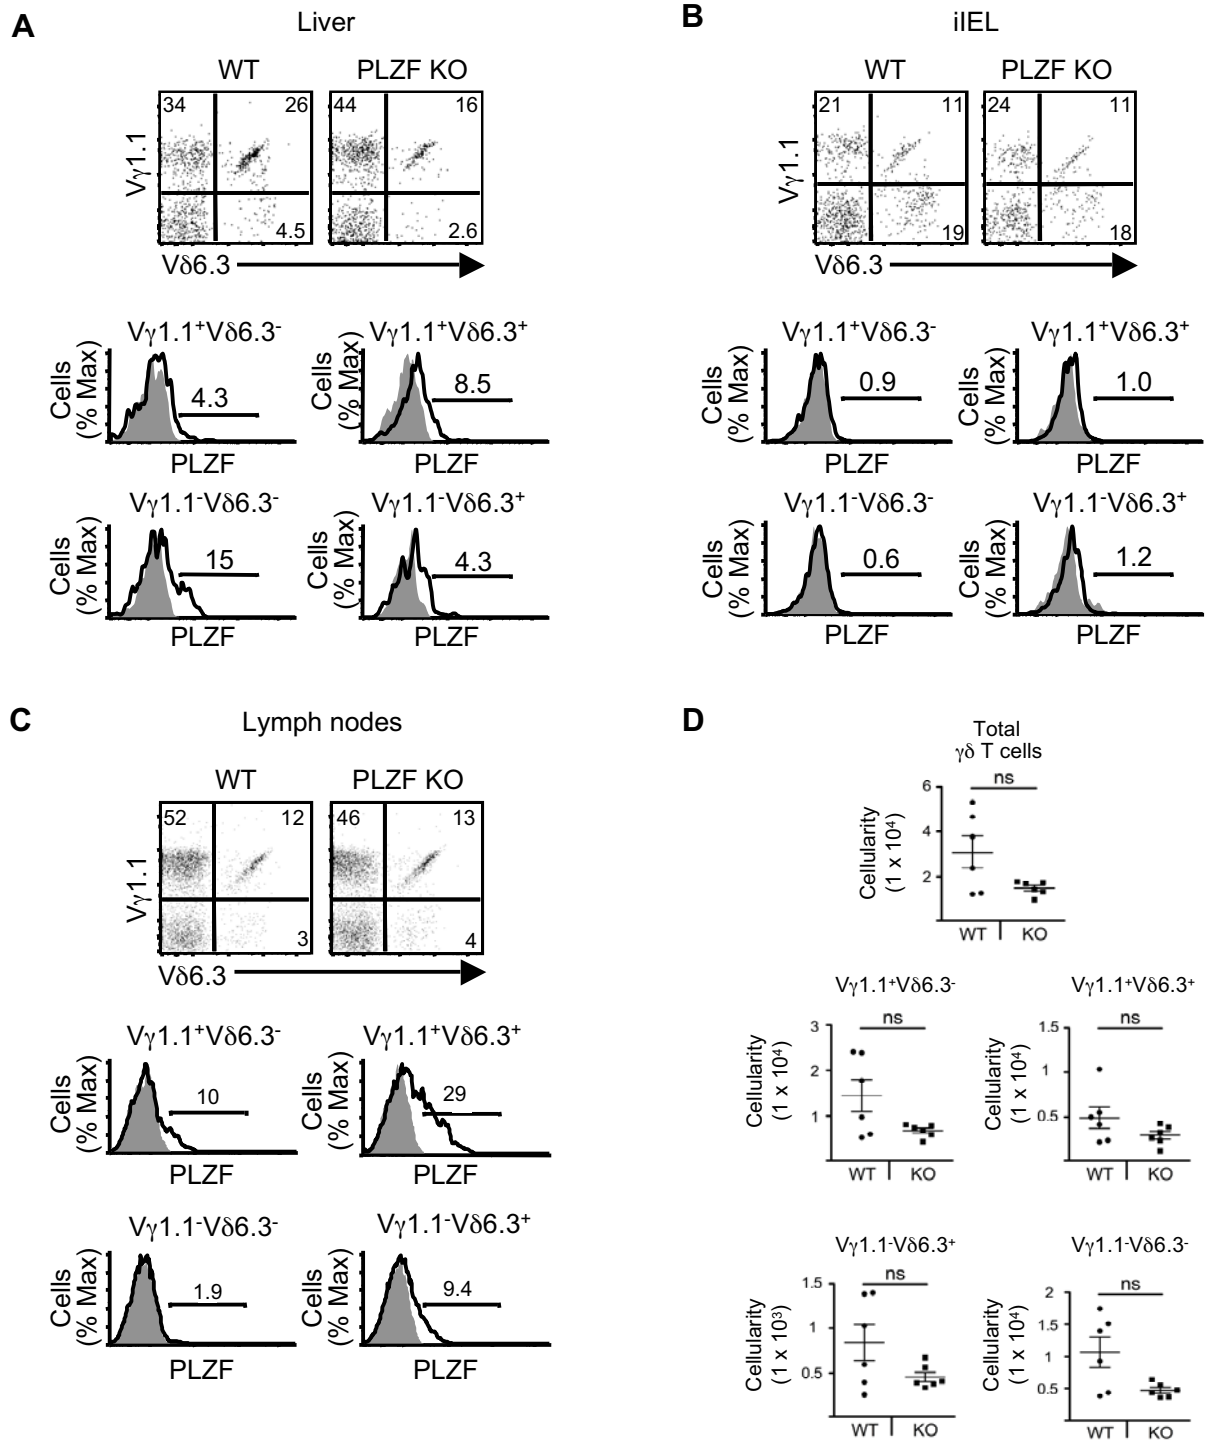

Figure S1 Alonzo et al

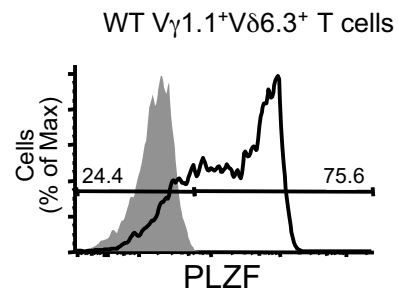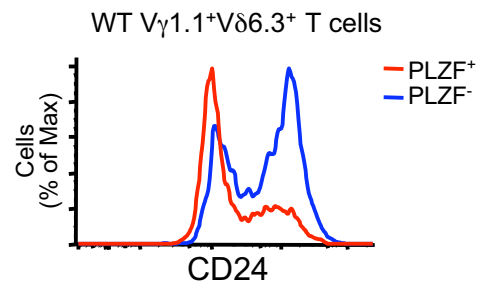

**A**

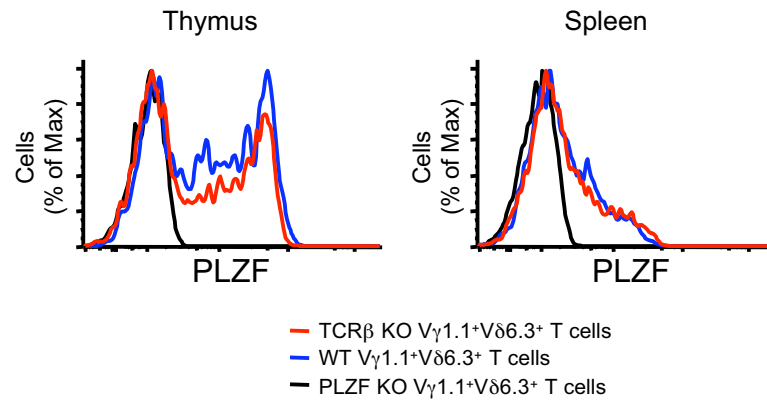

**B**

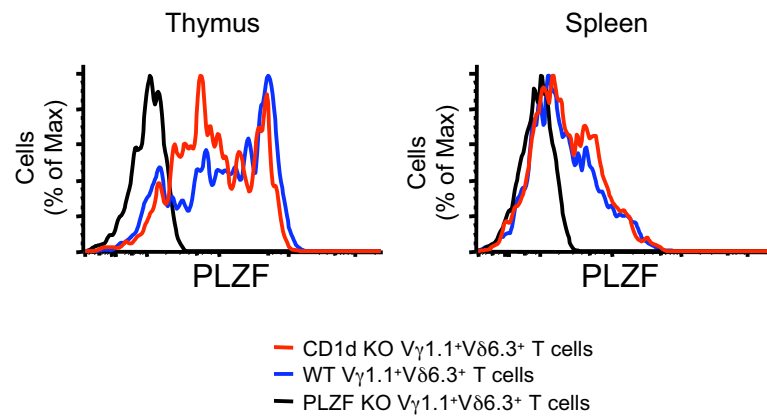

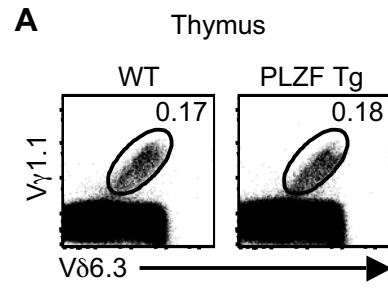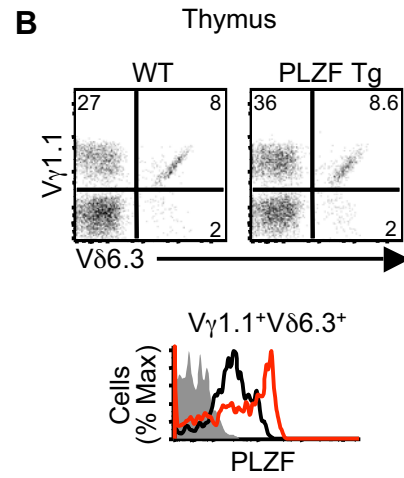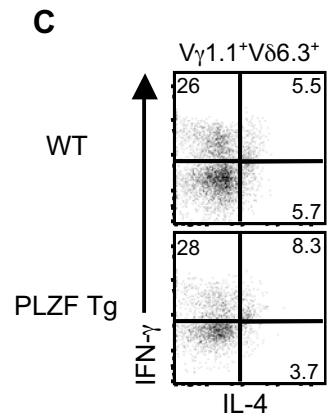

Figure S4 Alonzo et al

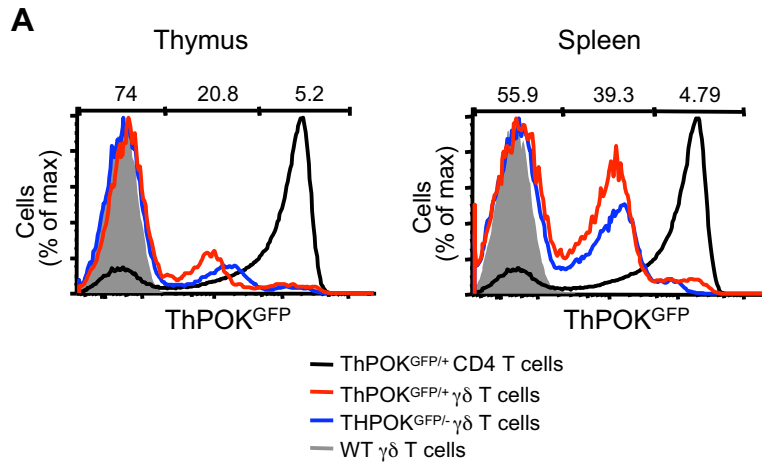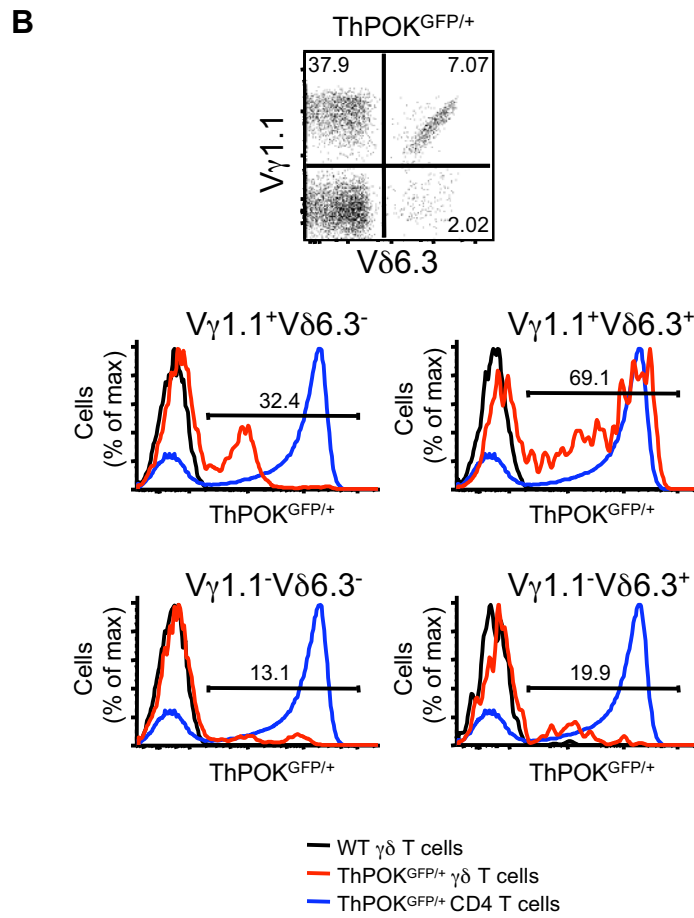

Figure S5 Alonzo et al

A

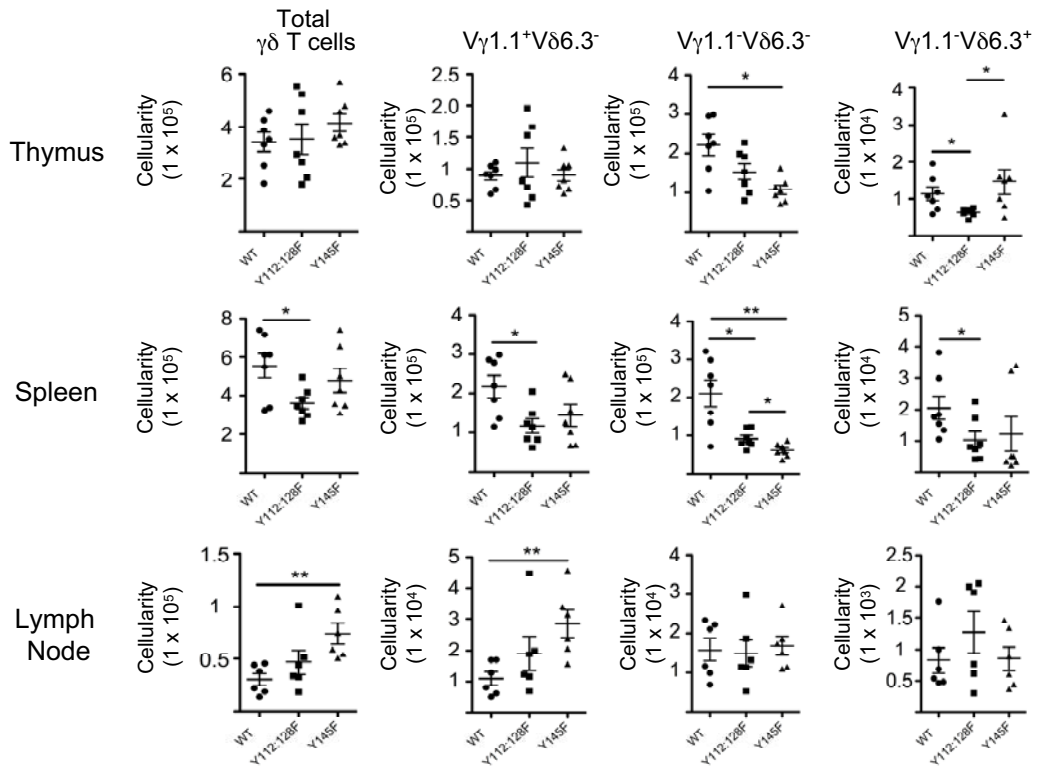

B

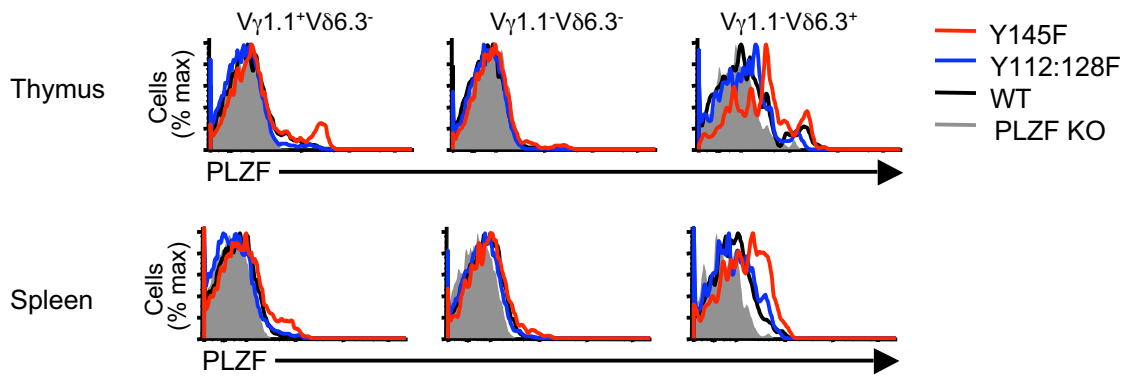

C

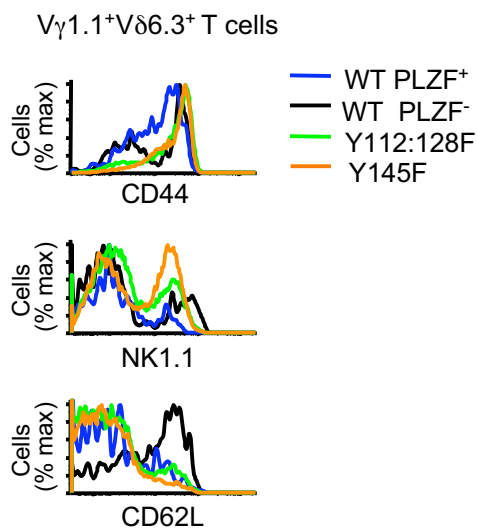

D

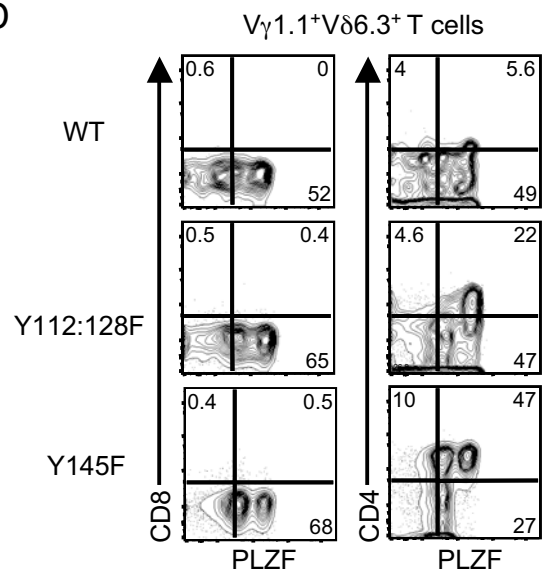

Figure S6 Alonzo et al

A

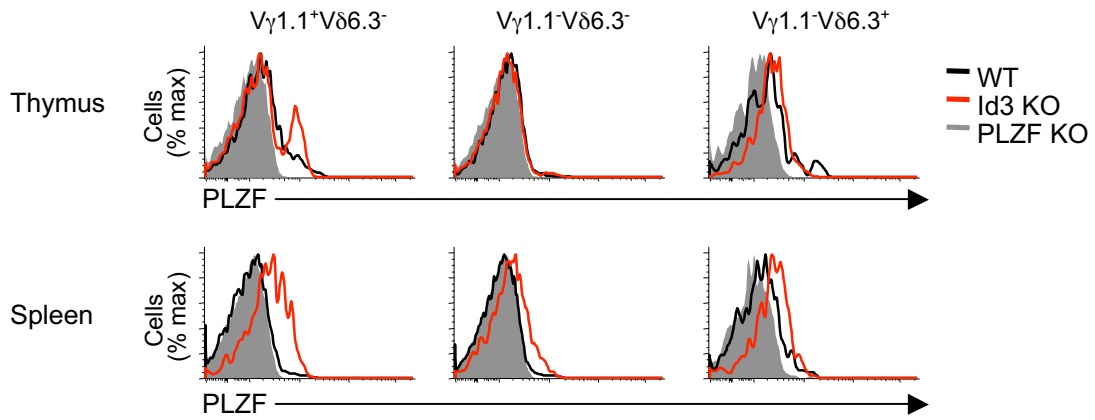

B

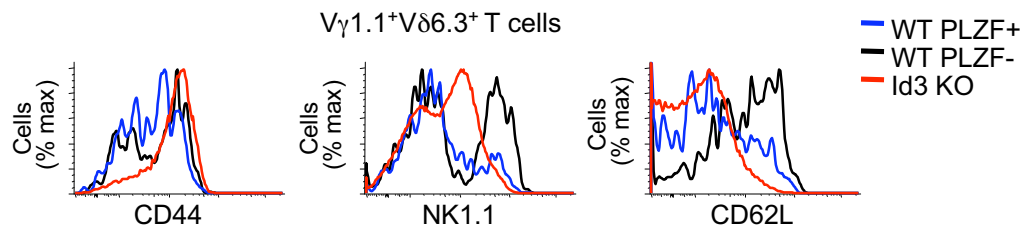

C

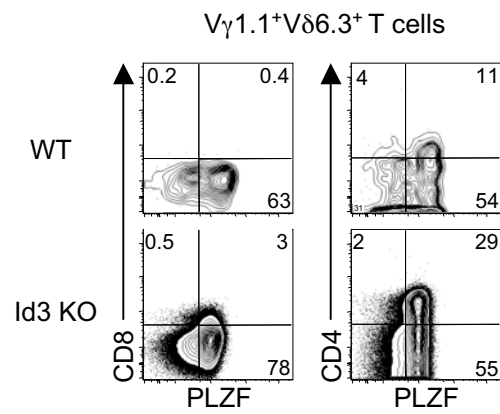

## Supplementary material.

**Figure S1. PLZF expression in  $\gamma\delta$  T cells subsets.** Intracellular staining for PLZF in subpopulations of  $\gamma\delta$  T cells in (A) liver lymphocytes (liver), (B) intraepithelial lymphocytes (iIELs), (C) Lymph nodes from wild-type (WT) and PLZF-deficient (PLZF KO) mice. (D) Absolute numbers of total  $\gamma\delta$  T cells, and  $\gamma\delta$  T cell subsets from the lymph nodes of wild-type and PLZF-deficient mice.  $\gamma\delta$  T cells from PLZF-deficient mice were used as a negative control for PLZF staining. Numbers adjacent to outlined areas indicate percent of  $\gamma\delta$  T cell subsets (A-C) or bracketed lines in histograms specify percent total PLZF positive cells (A-C). Data are representative of more than four independent experiments. All flow cytometry plots are quantified in log<sub>10</sub> fluorescence.

**Figure S2. Analysis of CD24 expression on developing  $V\gamma 1.1^+V\delta 6.3^+$  T cells.**  $\gamma\delta$  T cells enriched from the thymuses of 10-day-old wild-type were stained with anti- $\gamma\delta$  TCR, anti- $V\gamma 1.1$ , anti- $V\delta 6.3$  TCR, anti-CD24 and anti-PLZF antibodies. Numbers above each bracket in the histogram indicate percent PLZF-positive  $V\gamma 1.1^+V\delta 6.3^+$  T cells.  $V\gamma 1.1^+V\delta 6.3^+$  T cells from PLZF-deficient mice served as a negative control for PLZF staining. Data are representative of three independent experiments. All flow cytometry plots are quantified in log<sub>10</sub> fluorescence.

**Figure S3. PLZF expression in  $V\gamma 1.1^+V\delta 6.3^+$  T cells from TCR $\beta$  and CD1d-deficient mice.** (A) PLZF expression analysis in  $V\gamma 1.1^+V\delta 6.3^+$  T cells from wild-type (blue), TCR $\beta$ -deficient (red) and (B) CD1d-deficient (red) thymocytes and lymphocytes.  $V\gamma 1.1^+V\delta 6.3^+$  T cells from PLZF-deficient mice served as a negative control for PLZF staining. Data are



representative of three independent experiments. All flow cytometry plots are quantified in log<sub>10</sub> fluorescence.

**Figure S4. Ectopic expression of PLZF has no effect on  $\gamma\delta$  T cell effector functions.**

(A) Intracellular staining for PLZF in  $\gamma\delta$  T cells as described, or (B)  $V\gamma 1.1^+V\delta 6.3^+$  T cells in WT, PLZF-deficient and Lck-PLZF transgenic thymocytes. (C) Intracellular staining for IFN- $\gamma$  and IL-4 from pooled splenocytes and lymphocytes in WT (top) and Lck-PLZF transgenic (bottom). Data are representative of at least three independent experiments. All flow cytometry plots are quantified in log<sub>10</sub> fluorescence.

**Figure S5. ThPOK expression in  $\gamma\delta$  T cells.** (A) GFP expression analysis in total  $\gamma\delta$  T

cells from the thymus and spleen from ThPOK<sup>GFP/+</sup> and ThPOK<sup>GFP/-</sup> mice. ThPOK expression in CD4 T cells from ThPOK<sup>GFP/+</sup> mice is shown as a control. Numbers above bracketed lines in histograms specify the percent of  $\gamma\delta$  T cells from the ThPOK<sup>GFP/+</sup> in each population as defined by GFP expression levels (negative, intermediate, or high). (B) ThPOK<sup>GFP/+</sup> reporter expression in subpopulations of  $\gamma\delta$  T cells in splenocytes that are  $V\gamma 1.1^+V\delta 6.3^-$ ,  $V\gamma 1.1^+V\delta 6.3^+$ ,  $V\gamma 1.1^-V\delta 6.3^+$ , or  $V\gamma 1.1^-V\delta 6.3^-$ . Numbers in quadrants indicate the percent of  $V\gamma 1.1^+V\delta 6.3^-$  (top left),  $V\gamma 1.1^+V\delta 6.3^+$  (top right),  $V\gamma 1.1^-V\delta 6.3^+$  (bottom right), and  $V\gamma 1.1^-V\delta 6.3^-$  (bottom left) or above bracketed lines in histograms specify the percent total ThPOK<sup>GFP/+</sup> positive cells. Wild-type  $\gamma\delta$  T cells were used as a negative control for GFP expression (A and B). All flow cytometry plots are quantified in log<sub>10</sub> fluorescence.

**Figure S6. Phenotypic analysis of non- $V\gamma 1.1^+V\delta 6.3^+$  T cells in SLP76 mutant mice.**

(A) Absolute numbers of total  $\gamma\delta$  T cells and  $V\gamma 1.1^+V\delta 6.3^-$ ,  $V\gamma 1.1^-V\delta 6.3^-$  and  $V\gamma 1.1^-V\delta 6.3^+$  T

cells subsets in the thymus (top), spleen (middle) and lymph nodes (bottom) in wild-type (WT), Y112:128F and Y145F mutant mice. (B) Intracellular staining for PLZF in  $V\gamma 1.1^+ V\delta 6.3^-$  (left),  $V\gamma 1.1^- V\delta 6.3^-$  (middle) and  $V\gamma 1.1^- V\delta 6.3^+$  (right) T cells in thymocytes (top) and splenocytes (bottom) in wild-type (WT; black), Y112:128F (blue) and Y145F (red) mutant mice. (C) Expression of CD44, NK1.1 and CD62L by PLZF-positive (blue) and PLZF-negative (black) wild-type (WT), Y112:128F (green), and Y145F (orange)  $V\gamma 1.1^+ V\delta 6.3^+$  thymocytes. (D) CD4 and CD8 expression on  $V\gamma 1.1^+ V\delta 6.3^+$  thymocytes in wild-type (WT; top), Y112:128F (middle) and Y145F (bottom) as compared to intracellular staining for PLZF. PLZF-deficient  $\gamma\delta$  T cells (gray) served as a negative control for PLZF staining in histograms (B). Each symbol represents an individual mouse (\*  $P = 0.05$ ). Error bars represent the SD. Data are representative of at least six experiments. All flow cytometry plots are quantified in log<sub>10</sub> fluorescence.

**Figure S7. Phenotypic analysis of non- $V\gamma 1.1^+ V\delta 6.3^+$  T cells in Id3-deficient mice.** (A)

(A) Intracellular staining for PLZF in  $V\gamma 1.1^+ V\delta 6.3^-$  (left),  $V\gamma 1.1^- V\delta 6.3^-$  (middle) and  $V\gamma 1.1^- V\delta 6.3^+$  (right) T cells in thymocytes (top) and splenocytes (bottom) in wild-type (WT; black), Id3-deficient (Id3 KO) mice. (B) Expression of CD44, NK1.1 and CD62L by PLZF-positive (blue) and PLZF-negative (black) wild-type (WT) and Id3-deficient (Id3 KO; red)  $V\gamma 1.1^+ V\delta 6.3^+$  thymocytes. (D) CD4 and CD8 expression on  $V\gamma 1.1^+ V\delta 6.3^+$  thymocytes in wild-type (WT; top) and Id3-deficient (Id3 KO; red) as compared to intracellular staining for PLZF. PLZF-deficient  $\gamma\delta$  T cells (gray) served as a negative control for PLZF staining in histograms (B). Data are representative of at least four experiments. All flow cytometry plots are quantified in log<sub>10</sub> fluorescence.
